# Supplementary material
Source: ML conference proceedings conference paper supplement (https://proceedings.neurips.cc/paper_files/paper/2020/hash/56dc0997d871e9177069bb472574eb29-Abstract.html)
Supplement: Supplementary file [file 56dc0997d871e9177069bb472574eb29-Supplemental.pdf]

---

# Appendix: Language and Visual Entity Relationship Graph for Agent Navigation

---

Yicong Hong<sup>1</sup> Cristian Rodriguez-Opazo<sup>1</sup> Yuankai Qi<sup>2</sup> Qi Wu<sup>2</sup> Stephen Gould<sup>1</sup>

<sup>1</sup>Australian National University <sup>2</sup>The University of Adelaide  
<sup>1,2</sup>Australian Centre for Robotic Vision

{yicong.hong, cristian.rodriguez, stephen.gould}@anu.edu.au  
qykshr@gmail.com, qi.wu01@adelaide.edu.au

## Appendix A Equations

We provide the equations of the soft-attention function  $\text{SoftAttn}()$  and the non-linear projection  $\Pi()$  which are repeatedly used in this paper.

### A.1 Soft-Attention

Suppose  $q$  is the query and  $y = \{y_1, y_2, \dots, y_n\}$  is a set of values, we express the soft-attention [11] function  $\tilde{y} = \text{SoftAttn}(q, y)$  as

$$\alpha_j = \text{softmax}_j(y_j^T W q) \quad (1)$$

$$\tilde{y} = \sum_{j=1}^n \alpha_j y_j \quad (2)$$

where  $W$  is a  $\mathbb{R}^{m \times n}$  learned linear projection for  $n$ -dimensional query and  $m$ -dimensional values,  $\alpha_j$  is the attention weight of value  $y_j$  and  $\tilde{y}$  is the attended value.

### A.2 Non-Linear Projection

Suppose  $y$  is an input vector, the non-linear projection  $\Pi(y)$  is defined as:

$$\Pi(y) = \text{Tanh}(W y) \quad (3)$$

where  $W$  is a learned linear projection, and  $\text{Tanh}$  is applied element-wise.

## Appendix B Implementation Details

### B.1 Observed Features

At each navigable viewpoint, the agent observes a panoramic view of its surroundings. The panoramic view consists of 36 single-view images at 12 heading angles and 3 elevation angles relative to agent's orientation. The scene, object and directional features are encoded for each single-view separately.

**Scene features** The R2R dataset [2] provides image features for each single-view encoding by two convolutional networks, a ResNet-152 [4] pre-trained on ImageNet [9] and a ResNet-152 [4] pre-trained on Places365 [12]. Ma et al. finds that the Self-Monitoring agent [6] performs similar with the two image features, we also find in our experiments with the baseline model (EnvDrop [10]) that using the two image features achieve very similar results. However, while most of the previous

works apply ImageNet features as the scene feature, our agent uses the Places365 features for two reasons: (1) the Places365 dataset is proposed mainly for scene recognition task, which closely agrees with the concept of scene that we defined in this paper. (2) The ImageNet features can be considered as a summary of salient objects in the scene, which contains similar information as the object representations applied by our agent.

**Object features** In this work, we apply a Faster-RCNN [8] pre-trained on the Visual Genome [5] by Anderson et al. [1] as object detector. We use the detector to predict object labels rather than to extract object visual encodings (convolutional features). Then, we encode the labels using GloVe [7] and use the encoded labels as object features. We argue that using labels instead of visual encodings can provide much certain signals to indicate the existence of an object, since the agent only needs to learn the text-text correspondence rather than the hard text-visual correspondence. We experiment with the encoded object labels and the object visual encodings, and find that the agent performs much better with the encoded object labels.

**Directional features** As in previous work [3, 6, 10], we apply a 128-dimensional directional encoding by replicating  $(\cos\theta_i, \sin\theta_i, \cos\phi_i, \sin\phi_i)$  by 32 times to represent the orientation of each single-view  $i$  with respect to the agent’s current orientation, where  $\theta_i$  and  $\phi_i$  are the angles of the heading and elevation to that single-view. Replicating the encoding by 32 times does not enrich its information but makes its gradient 32 times larger during back-propagation. We suspect that this benefits the agent to learn about the action-related terms (e.g. “*turn left*”, “*go forward*”) in the instructions, which are sometimes more important than the other visual clues.

## B.2 Training

The training of our agent consists of two stages. At the first stage, we train the agent on the train split of the dataset. At the second stage, we pick the model with the highest SPL from the first stage and train with self-supervised learning on the augmented data generated from the train set [10]. In the second stage, we also perform a one-step learning rate decay. Once the agent’s performance saturates, we pick the model with the highest SPL and continue training with learning rate of 1e-5.

**Hyper-parameters** Most of the hyper-parameters and settings in our network are the same as in the baseline model [10], such as the learning rate (1e-4 before decay), the maximum navigational step allowed (35 steps), the weighting of imitation learning loss (0.2 on training data and 0.6 on augmented data) and the optimizer (RMSprop). We reduce the batch size from 64 to 32 due to the GPU memory limitation. We did not perform hyper-parameter search on the number of objects in each single-view or the dimension of features.

**Training iterations and evaluation** We perform the first training stage for 80,000 iterations and continue the training in the second stage until 200,000 iterations. Then, after learning rate decay, we keep training the network until 300,000 iterations. Evaluation on the validation splits is performed every 100 iterations, results and network weights are carefully saved. We choose model with the highest SPL in the validation unseen split as the final model.

**Computing infrastructure and runtime** All experiments are conducted on a NVIDIA RTX 2080 Ti GPU. The average runtime of the first training stage is 24 hours, and the second training stage requires at most 60 hours to complete (including the time spent on evaluation). Early stop has been applied if the network overfits and the agent’s performance degenerates significantly.

## Appendix C Graph with Multi-Iterations Update

Our proposed language-conditioned visual graph supports update with multiple iterations. In Table 1, we compare the results by training the agent with  $N$  iterations of graph update and testing with  $n \leq N$  iterations of graph update. Overall, as the number of iterations in training increases, agent’s performance in testing drops. The agent trained and tested with a single-step graph update obtains the highest SR and SPL, hence for efficiency and better performance, the visual graph only run a single-step update.

Table 1: Comparison of single-run performance on R2R validation unseen split with different number of graph iteration in training and testing.

| Iterations in Training | Iterations in Testing |             |             |             |       |      |      |      |       |      |      |      |
|------------------------|-----------------------|-------------|-------------|-------------|-------|------|------|------|-------|------|------|------|
|                        | 1                     |             |             |             | 2     |      |      |      | 3     |      |      |      |
|                        | TL                    | NE↓         | SR↑         | SPL↑        | TL    | NE↓  | SR↑  | SPL↑ | TL    | NE↓  | SR↑  | SPL↑ |
| 1                      | 9.99                  | 4.73        | <b>0.57</b> | <b>0.53</b> | -     | -    | -    | -    | -     | -    | -    | -    |
| 2                      | 9.84                  | <b>4.60</b> | 0.56        | 0.52        | 15.04 | 4.62 | 0.56 | 0.52 | -     | -    | -    | -    |
| 3                      | 9.71                  | 4.79        | 0.54        | 0.50        | 10.17 | 4.90 | 0.54 | 0.51 | 13.06 | 4.78 | 0.55 | 0.51 |

## Appendix D Visualization of Trajectories

In the following pages, we present some navigational trajectories and the attended relational contexts of our agent in the R2R validation unseen environments. In the figures, *Distance* is the current distance to target, red arrow indicates the predicted directions and red square indicates the predicted *STOP* action.

## References

- [1] Peter Anderson, Xiaodong He, Chris Buehler, Damien Teney, Mark Johnson, Stephen Gould, and Lei Zhang. Bottom-up and top-down attention for image captioning and visual question answering. In *Proceedings of the IEEE Conference on Computer Vision and Pattern Recognition*, pages 6077–6086, 2018.
- [2] Peter Anderson, Qi Wu, Damien Teney, Jake Bruce, Mark Johnson, Niko Sünderhauf, Ian Reid, Stephen Gould, and Anton van den Hengel. Vision-and-language navigation: Interpreting visually-grounded navigation instructions in real environments. In *Proceedings of the IEEE Conference on Computer Vision and Pattern Recognition*, pages 3674–3683, 2018.
- [3] Daniel Fried, Ronghang Hu, Volkan Cirik, Anna Rohrbach, Jacob Andreas, Louis-Philippe Morency, Taylor Berg-Kirkpatrick, Kate Saenko, Dan Klein, and Trevor Darrell. Speaker-follower models for vision-and-language navigation. In *Advances in Neural Information Processing Systems*, pages 3314–3325, 2018.
- [4] Kaiming He, Xiangyu Zhang, Shaoqing Ren, and Jian Sun. Deep residual learning for image recognition. In *Proceedings of the IEEE conference on computer vision and pattern recognition*, pages 770–778, 2016.
- [5] Ranjay Krishna, Yuke Zhu, Oliver Groth, Justin Johnson, Kenji Hata, Joshua Kravitz, Stephanie Chen, Yannis Kalantidis, Li-Jia Li, David A Shamma, et al. Visual genome: Connecting language and vision using crowdsourced dense image annotations. *International Journal of Computer Vision*, 123(1):32–73, 2017.
- [6] Chih-Yao Ma, Jiasen Lu, Zuxuan Wu, Ghassan AlRegib, Zsolt Kira, Richard Socher, and Caiming Xiong. Self-monitoring navigation agent via auxiliary progress estimation. In *Proceedings of the International Conference on Learning Representations (ICLR)*, 2019.
- [7] Jeffrey Pennington, Richard Socher, and Christopher D Manning. Glove: Global vectors for word representation. In *Proceedings of the 2014 conference on empirical methods in natural language processing (EMNLP)*, pages 1532–1543, 2014.
- [8] Shaoqing Ren, Kaiming He, Ross Girshick, and Jian Sun. Faster r-cnn: Towards real-time object detection with region proposal networks. In *Advances in neural information processing systems*, pages 91–99, 2015.
- [9] Olga Russakovsky, Jia Deng, Hao Su, Jonathan Krause, Sanjeev Satheesh, Sean Ma, Zhiheng Huang, Andrej Karpathy, Aditya Khosla, Michael Bernstein, Alexander C. Berg, and Li Fei-Fei. ImageNet Large Scale Visual Recognition Challenge. *International Journal of Computer Vision (IJCV)*, 115(3):211–252, 2015.

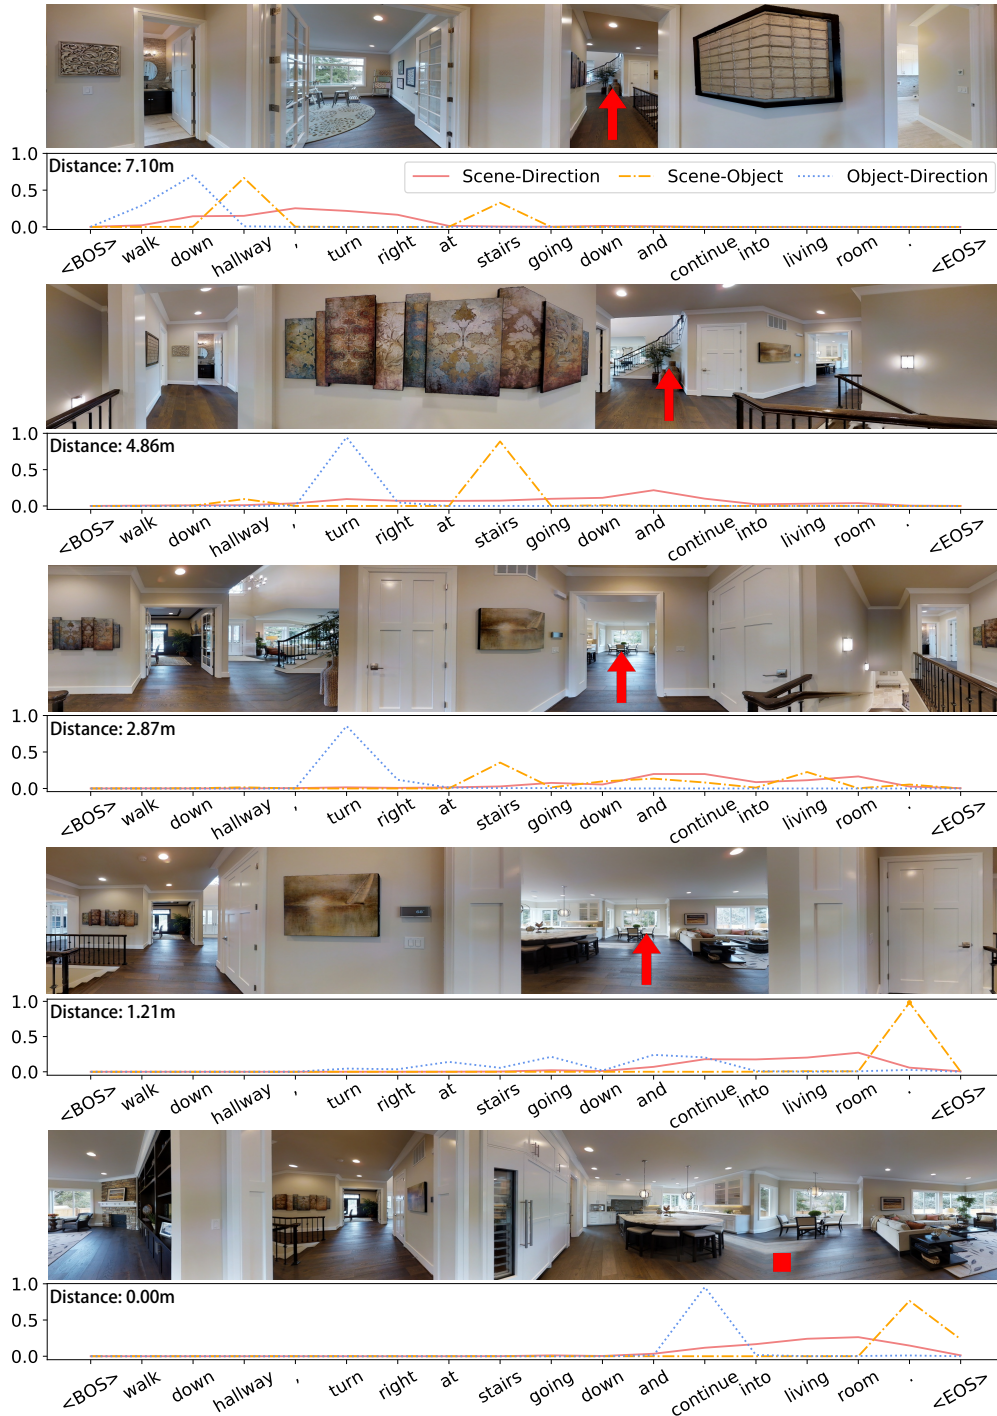

Figure 1: Navigational trajectories and the attended relational contexts of a successful sample. During navigation, the three relational contexts extract the most relevant contextual clues to guide the message passing among visual features (e.g. the scene-object context emphasizes “hallway” and “stairs”, while the object-direction context highlights “walk down”, “turn” and “continue”). As the agent approaches the target and there is no more objects left in the instruction, the scene-object context highlights the full-stop punctuation at the end of the sentence to suggest a *STOP* action.

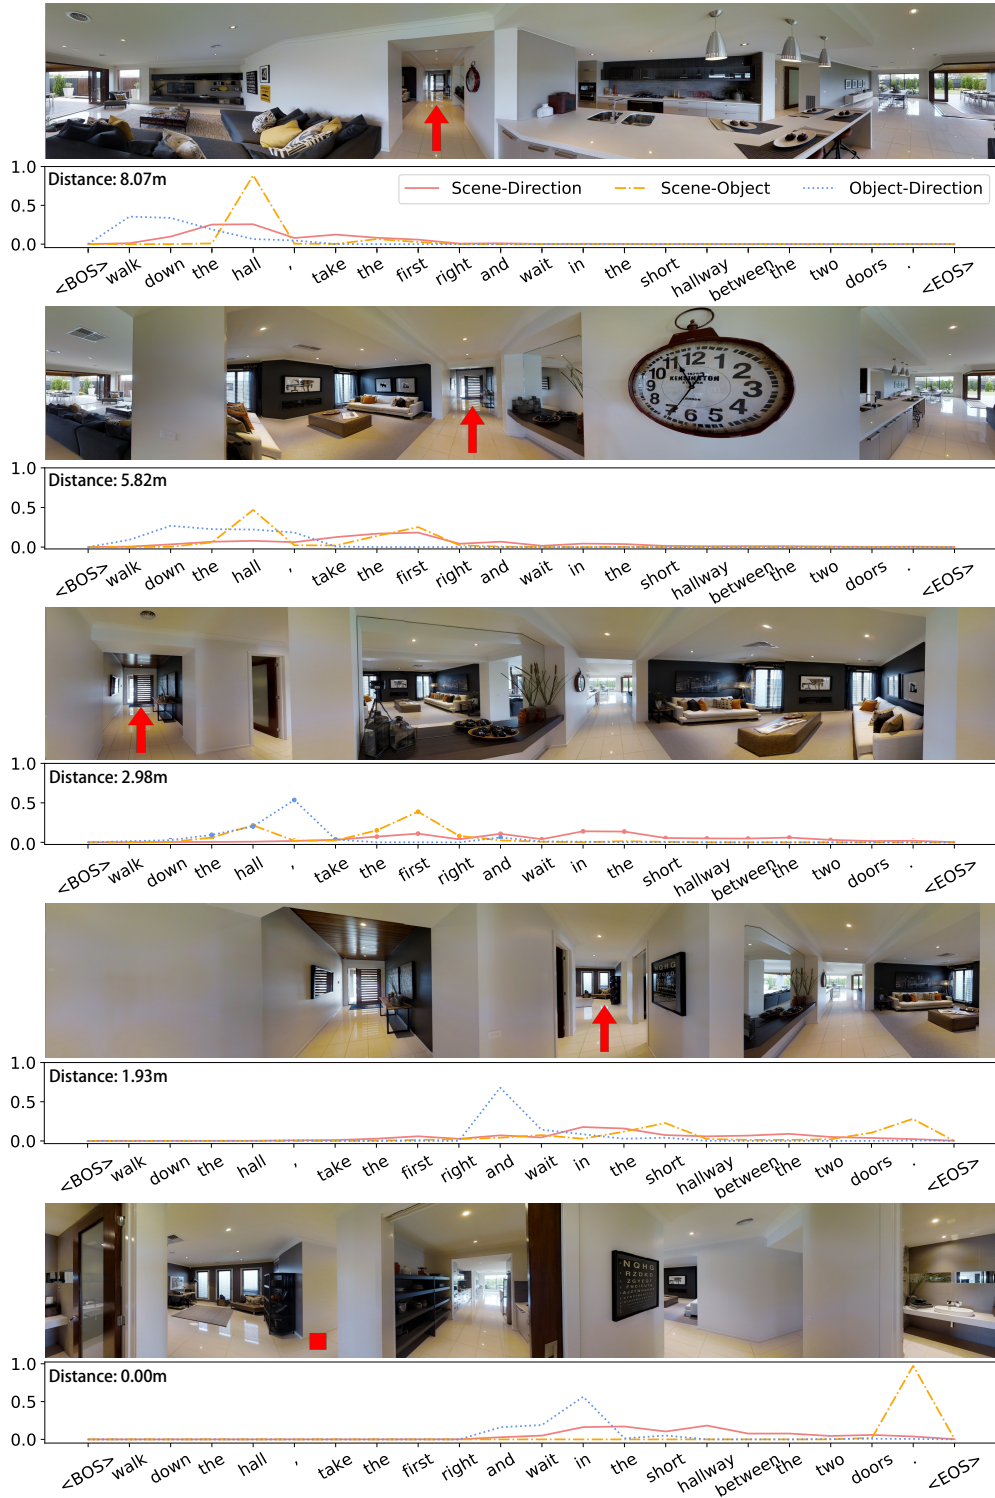

Figure 2: Navigational trajectories and the attended relational contexts of a successful sample. During navigation, the three relational contexts extract the most relevant contextual clues (e.g. the scene-object context emphasizes “hall”, while the object-direction context highlights “walk down” and “wait in”). We suspect that since the scene features are closer to a general representation of the environment, so that the scene-direction contexts often cover a larger portion of the instruction which matches the progress of navigation.

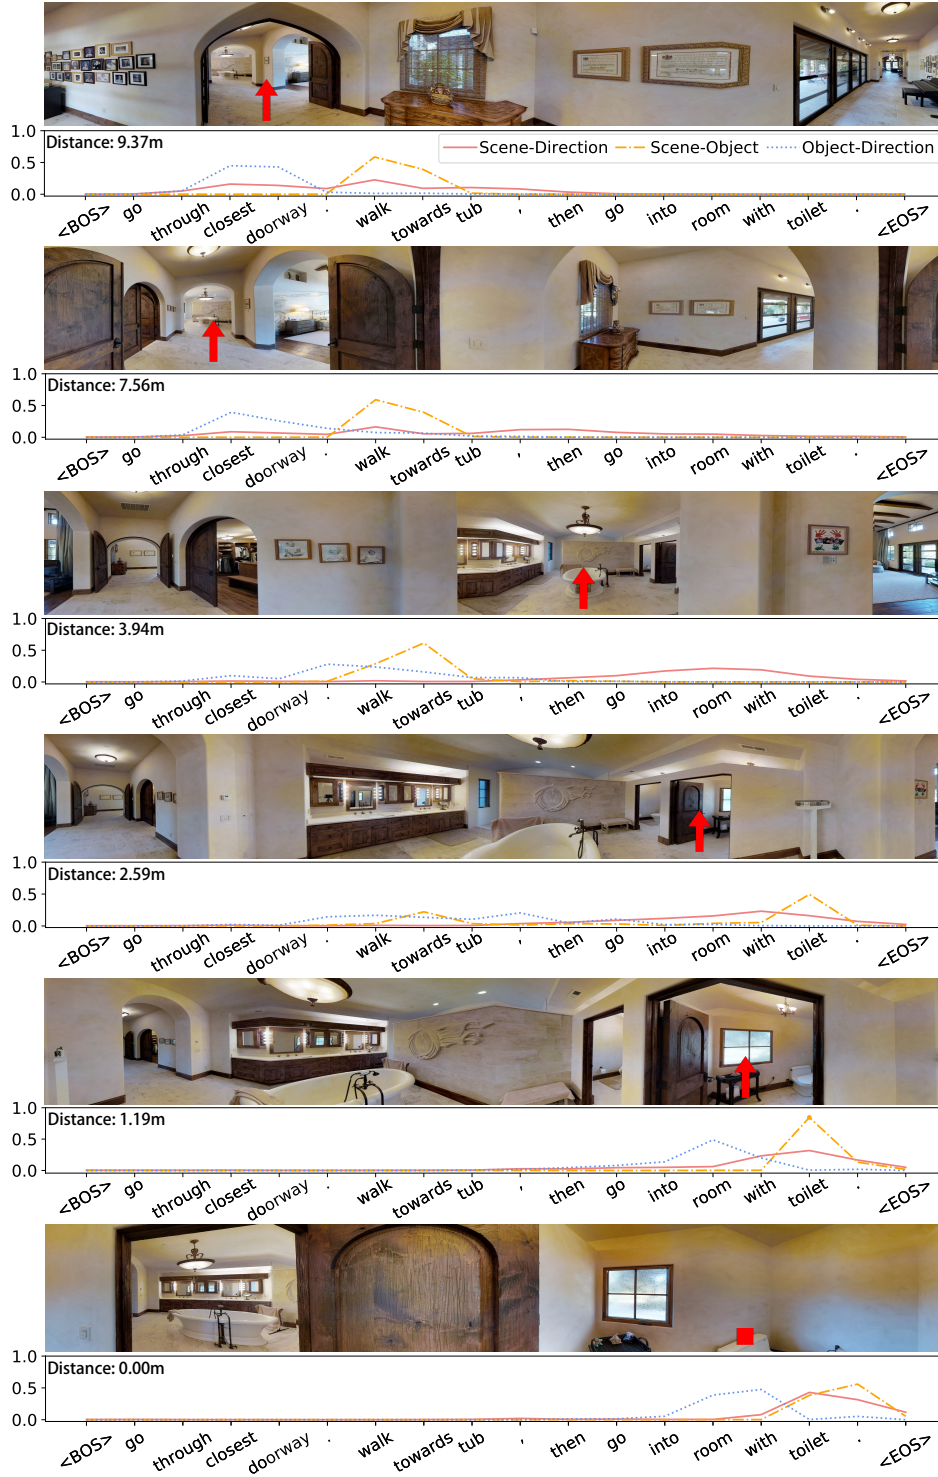

Figure 3: Navigational trajectories and the attended relational contexts of a successful sample. It is interesting to see that the scene-object context first highlights “walk towards” to indicate the agent should move to an object (“tub”). Later, as the agent approaches the target, the scene-object context highlights “toilet” since it is a landmark of the *STOP* action. This example suggests that the relational context in message passing not only guide the sharing of visual information, but also add contextual information to the visual features on the graph.

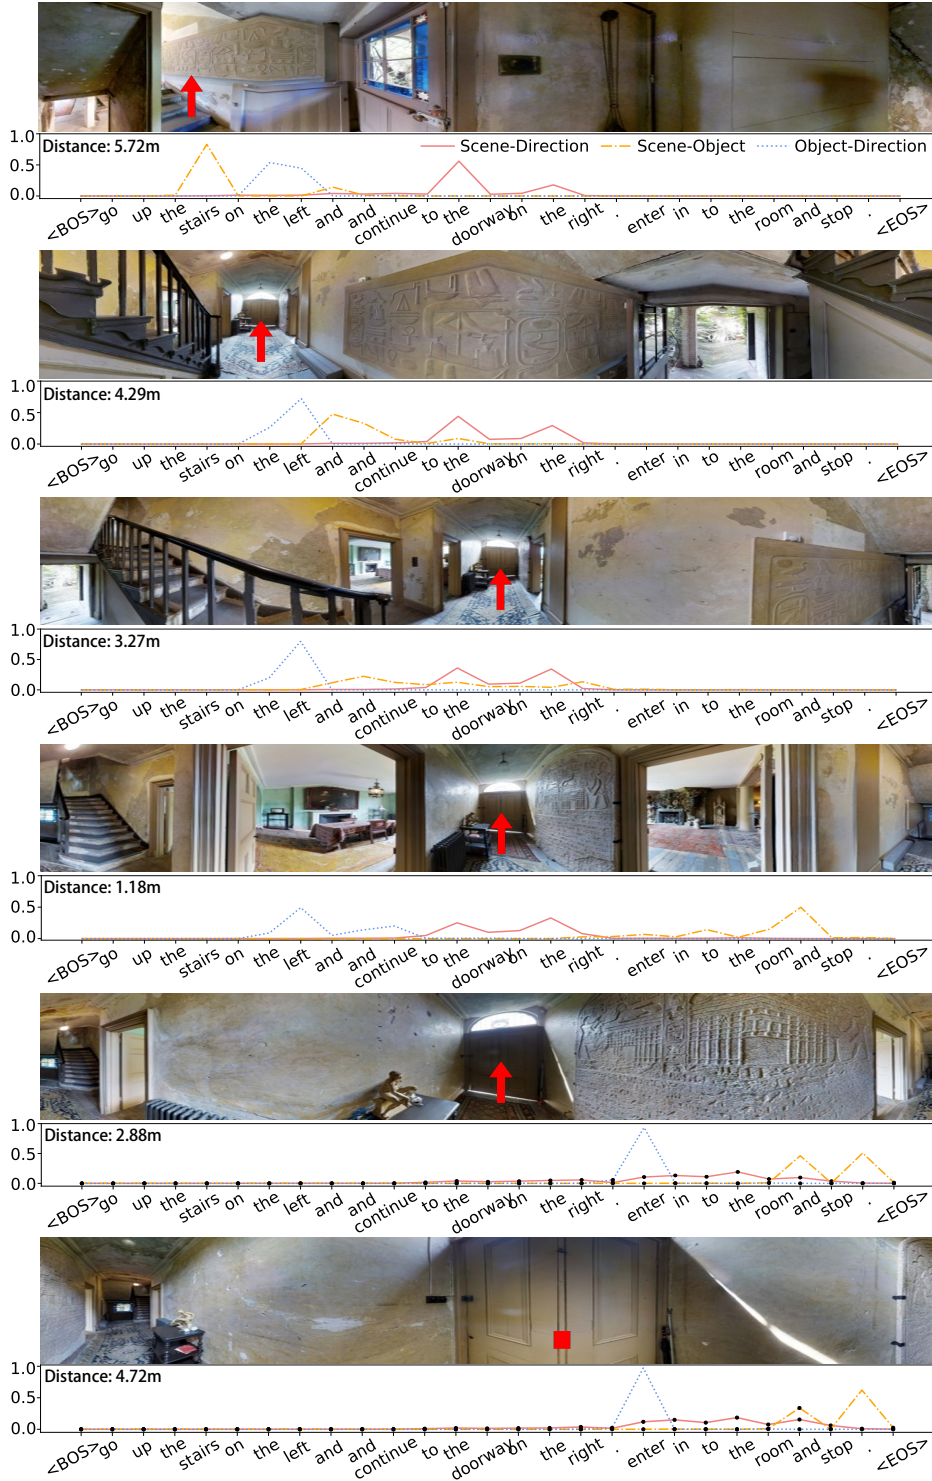

Figure 4: Navigational trajectories and the attended relational contexts of a failure sample. As the agent moves on, the object-direction context fails to transit to the later part of the instruction but it keeps highlighting “(stairs) on the left” which the relevant action has already been completed. It is likely that such information confuses the agent so that the agent moves to a wrong viewpoint at step 3, and finally stops at a wrong place. In future work, a method which encourages an alignment between the relational attentions and the navigation progress might be helpful.

- [10] Hao Tan, Licheng Yu, and Mohit Bansal. Learning to navigate unseen environments: Back translation with environmental dropout. In *Proceedings of NAACL-HLT*, pages 2610–2621, 2019.
- [11] Kelvin Xu, Jimmy Ba, Ryan Kiros, Kyunghyun Cho, Aaron Courville, Ruslan Salakhudinov, Rich Zemel, and Yoshua Bengio. Show, attend and tell: Neural image caption generation with visual attention. In *International conference on machine learning*, pages 2048–2057, 2015.
- [12] Bolei Zhou, Agata Lapedriza, Aditya Khosla, Aude Oliva, and Antonio Torralba. Places: A 10 million image database for scene recognition. *IEEE transactions on pattern analysis and machine intelligence*, 40(6):1452–1464, 2017.
